# Supplementary material
Source: publisher figshare collection journal article supplement (https://acs.figshare.com/ndownloader/files/5778564)
Supplement: Supplementary file 1 [file 5778564]

***Recent Reviews. 58***

compiled by Veronica M. Cornel

## Department of Chemistry, Reedley College, 339 W. Carpenter Ave, Reedley, CA93654

Reviews are listed in order of appearance in the sources indicated. In multidisciplinary review journals, only those reviews which fall within the scope of this Journal are included. Sources are listed alphabetically in three categories: regularly issued review journals and series volumes, contributed volumes, and other monographs. Titles are numbered serially, and these numbers are used for reference in the index.

Major English-language sources of critical reviews are covered. Encyclopedic treatises, annual surveys such as *Specialist Periodical Reports*, and compilations of symposia proceedings are omitted.

This installment of Recent Reviews covers principally the middle part of the 2000 literature. Previous installment: *J. Org. Chem*.**2000**, *65*(14), 4464-74.

**Supporting Information Available:** A file containing this Recent Review compilation in Microsoft Word and the data in rtf format is available free of charge *via* the Internet at http://pubs.acs.org.

**Regularly Issued Journals and Series Volumes**

**Accounts of Chemical Research**

**1.** Baciocchi, E.; Bietti, M.; Lanzalunga, O. Mechanistic Aspects of -Bond-Cleavage Reactions of Aromatic Radical Cations. **2000**, *33*(4), 243-51.

**2.** Helmchen, G.; Pfaltz, A. Phosphinooxazolines-A New Class of Versatile, Modular P,N- Ligands for Asymmetric Catalysis. **2000**, *33*(6), 336-45.

**3.** Feringa, B. L. Phosphoramidites: Marvellous Ligands in Catalytic Asymmetric Conjugate Addition. **2000**, *33*(6), 346-53.

**4.** Hayashi, T. Chiral Monodentate Phosphine Ligand MOP for Transition Metal-Catalyzed Asymmetric Reactions. **2000**, *33*(6), 354-62.

**5.** Burk, M. J. Modular Phospholane Ligands in Asymmetric Catalysis. **2000**, *33*(6), 363-72.

**6.** Frantz, D. E.; Faessler, R.; Tomooka, C. S.; Carreira, E. M. The Discovery of Novel Reactivity in the Development of C-C Bond-Forming Reactions: *In Situ* Generation of Zinc Acetylides with ZnII/R3N. **2000**, *33*(6), 373-81.

**7.** Soai, K.; Shibata, T.; Sato, I. Enantioselective Automultiplication of Chiral Molecules by Asymmetric Autocatalysis. **2000**, *33*(6), 382-90.

**8.** Blackmond, D. G. Kinetic Aspects of Nonlinear Effects in Asymmetric Catalysis. **2000**, *33*(6), 402-11.

**9.** Fu, G. C. Enantioselective Nucleophilic Catalysis with "Planar-Chiral" Heterocycles. **2000**, *33*(6), 412-20.

**10.** Jacobsen, E. N. Asymmetric Catalysis of Epoxide Ring-Opening Reactions. **2000**, *33*(6), 421-31.

**11.** Denmark, S. E.; Stavenger, R. A. Asymmetric Catalysis of Aldol Reactions with Chiral Lewis Bases. **2000**, *33*(6), 432-40.

**12.** Montgomery, J. Nickel-Catalyzed Cyclizations, Couplings, and Cycloadditions Involving Three Reactive Components. **2000**, *33*(7), 467-73.

**Advances in Carbohydrate Chemistry and Biochemistry**

**13.** Fernandez, J. M. G.; Mellet, C. O. Chemistry and Developments of N-Thiocarbonyl Carbohydrate Derivatives: Sugar Isothiocyanates, Thioamides, Thioureas, Thiocarbamates, and Their Conjugates. **2000**, (55), 35-135.

**14.** El Khadem, H. S.; Fatiadi, A. J. Hydrazine Derivatives of Carbohydrates and Related Compounds. **2000**, (55), 175-263.

**Aldrichimica Acta**

**15.** Hopps, H. B. Purpald: A Reagent that Turns Aldehydes Purple! **2000**, *33*(1), 28-30.

**Angewandte Chemie, International Edition in English**

**16.**  Falk, H. From the Photosensitizer Hypericin to the Photoreceptor Stentorin-The Chemistry of Phenanthroperylene Quinones. **1999**, *38*(21), 3117-36.

**17.**  Sturmer, R. Take the Right Catalyst: Palladium-Catalyzed C-C, C-N, and C-O Bond Formation on Chloroarenes. **1999**, *38*(22), 3307-8.

**18.**  Feringa, B. L.; Van Delden, R. A. Absolute Asymmetric Synthesis: The Origin, Control, and Amplification of Chirality. **1999**, *38*(23), 3419-38.

**19.**  Nicolaou, K. C.; Vourloumis, D.; Winssinger, N.; Baran, P. S. The Art and Science of Total Synthesis at the Dawn of the Twenty-First Century. **2000**, *39*(1), 44-122.

**20.**  Kuck, D. Thermochemical Data of Organic Ions Obtained from Investigations in the More or Less "Diluted" Gas Phase. **2000**, *39*(1), 125-30.

**21.**  Rau, H. K.; DeJonge, N.; Haehnel, W. Combinatorial Synthesis of Four-Helix Bundle Hemoproteins for Tuning of Cofactor Properties. **2000**, *39*(1), 250-3.

**22.**  Stephan, D. W. Zirconium-Phosphorus Chemistry: Strategies in Syntheses, Reactivity, Catalysis and Utility. **2000**, *39*(2), 315-29.

**23.**  Wirth, T. Oxygen and Osmium - A New Alliance for Dihydroxylations? **2000**, *39*(2), 334-5.

**24.**  Kempe, R. Highlights in the Renaissance of Amidometal Chemistry. **2000**, *39*(3), 468-93.

**25.**  Heller, D.; Drexler, H.-J.; Fischer, C.; Buschmann, H.; Baumann, W.; Heller, B. How Long have Nonlinear Effects been Known in the Field of Catalysis? **2000**, *39*(3), 495-9.

**26.**  Stephan, D. W. "Breaking the Rules": A Planar Phosphonium Cation. **2000**, *39*(3), 501-2.

**27.**  Danishefsky, S. J.; Allen, J. R. From the Laboratory to the Clinic: A Retrospective on Fully Synthetic Carbohydrate-Based Anticancer Vaccines. **2000**, *39*(5), 836-63.

**28.**  Eames, J. Parallel Kinetic Resolutions. **2000**, *39*(5), 885-8.

**29.**  Hartmann, M.; Ernst, S. Selective Oxidations of Linear Alkanes with Molecular Oxygen on Molecular Sieve Catalysts - A Breakthrough? **2000**, *39*(5), 888-90.

**30.**  Beller, M.; Eckert, M. Amidocarbonylation - An Efficient Route to Amino Acid Derivatives. **2000**, *39*(6), 1010-27.

**31.**  St. Hilaire, P. M.; Meldal, M. Glycopeptide and Oligosaccharide Libraries. **2000**, *39*(7), 1163-79.

**32.**  Starr, J. T.; Carreira, E. M. Syntheses of CP-225,917 and CP-263,114. **2000**, *39*(8), 1415-21.

**33.**  Zenobi, R.; Deckert, V. Scanning Near-Field Optical Microscopy and Spectroscopy as a Tool for Chemical Analysis. **2000**, *39*(10), 1747-56.

**Canadian Journal of Chemistry**

**34.** Leznoff, C. C. 1999 Alfred Bader Award Lecture. From Early Developments in Multi-Step Organic Synthesis on Solid Phases to Multi-Nuclear Phthalocyanines. **2000**, *78*(2), 167-83.

**Chemical Reviews**

**35.**  Siemeling, U. Chelate Complexes of Cyclopentadienyl Ligands Bearing Pendant O-Donors. **2000**, *100*(4), 1495-526.

**36.**  Feringa, B. L.; van Delden, R. A.; Koumura, N.; Geertsema, E. M. Chiroptical Molecular Switches. **2000**, *100*(5), 1789-816.

**37.**  McQuade, D. T.; Pullen, A. E.; Swager, T. M. Conjugated Polymer-Based Chemical Sensors. **2000**, *100*(7), 2537-74.

**38.**  Albert, K. J.; Lewis, N. S.; Schauer, C. L.; Sotzing, G. A.; Stitzel, S. E.; Vaid, T. P.; Walt, D. R. Cross-Reactive Chemical Sensor Arrays. **2000**, *100*(7), 2595-626.

**39.**  Grate, J. W. Acoustic Wave Microsensor Arrays for Vapor Sensing. **2000**, *100*(7), 2627-47.

**40.**  Jurs, P. C.; Bakken, G. A.; McClelland, H. E. Computational Methods for the Analysis of Chemical Sensor Array Data from Volatile Analytes. **2000**, *100*(7), 2649-78.

**Chemical Society Reviews**

**41.**  Nielsen, M. B.; Lomholt, C.; Becher, J. Tetrathiafulvalenes as Building Blocks in Supramolecular Chemistry II. **2000**, *29*(3), 153-64.

**42.**  Cousins, G. S.; Hoberg, J. O. Synthesis and Chemistry of Cyclopropanated Carbohydrates. **2000**, *29*(3), 165-74.

**43.**  van Doren, H. A.; Smits, E.; Pestman, J. M.; Engberts, J. B. F. N.; Kellogg, R. M. Mesogenic Sugars. From Aldoses to Liquid Crystals and Surfactants. **2000**, *29*(3), 183-99.

**44.**  Vankar, Y. D.; Schmidt, R. R. Chemistry of Glycosphingolipids-Carbohydrate Molecules of Biological Significance. **2000**, *29*(3), 201-16.

**45.**  Elander, N.; Jones, J. R.; Lu, S.-Y.; Stone-Elander, S. Microwave-Enhanced Radiochemistry. **2000**, *29*(4), 239-49.

**46.**  Pierre, J.-L. One Electron at a Time Oxidations and Enzymatic Paradigms: From Metallic to Non-Metallic Redox Centers. **2000**, *29*(4), 251-7.

**47.**  Mrksich, M. A Surface Chemistry Approach to Studying Cell Adhesion. **2000**, *29*(4), 267-73.

**Chemistry - A Europian Journal**

**48.** Rottlander, M.; Boymond, L.; Berillon, L.; Lepretre, A.; Varchi, G.; Avolio, S.; Laaziri, H.; Queguiner, G.; Ricci, A.; Cahiez, G.; Knochel, P. New Polyfunctional Magnesium Reagents for Organic Synthesis. **2000**, *6*(5), 767-70.

**49.** Groger, H.; Hammer, B. Catalytic Concepts for the Enantioselective Synthesis of -Amino and -Hydroxy Phosphonates. **2000**, *6*(6), 943-8.

**Chemistry and Industry**

**50.** Gibson, T.; Prosser, O.; Hulbert, J. Electronic Noses: An Inspired Idea? **2000**, (8), 287-9.

**CHEMTECH**

**51.**  Sawamoto, M.; Kamigaito, M. Transition-Metal-Catalyzed Living-Radical Polymerization. **1999**, *29*(6), 30-8.

**52.**  Matteson, D. S. -Haloboronic Esters: Versatile Reagents for Asymmetric Synthesis. **1999**, *29*(7), 6-14.

**53.**  Vaccaro, E.; Scola, D. A. New Applications of Polyaminoquinones. **1999**, *29*(7), 15-23.

**54.**  Bennett, A. M. A. Novel, Highly Active Iron and Cobalt Catalysts for Olefin Polymerization. **1999**, *29*(7), 24-8.

**55.**  Sessler, J. L.; Allen, W. E. Anion Carriers: New Tools for Crossing Membranes. **1999**, *29*(9), 16-24.

**56.**  Uyama, H.; Kobayashi, S. Enzymatic Polymerization Yields Useful Polyphenols. **1999**, *29*(10), 22-8.

**57.**  Arkles, B. Hybrid Polymers in the Marketplace. **1999**, *29*(12), 7-14.

**CHEMTRACTS: Organic Chemistry**

**58.**  Khosla, C. Combinatorial Biosynthesis: New Tools for the Medicinal Chemist. **1998**, *11*(1), 1-15.

**59.**  Wender, P. A.; Floreancig, P. E. Total Synthesis of (+/-)-Taxusin. **1998**, *11*(1), 16-22.

**60.**  Narasaka, K.; Iwasawa, N. Total Synthesis of Taxol. **1998**, *11*(1), 23-8.

**61.**  Venkatesan, H.; Liotta, D. C. The Baylis-Hillman Reaction: Practical Improvements and Asymmetric Synthesis. **1998**, *11*(1), 29-34.

**62.**  Yamada, T.; Mukaiyama, T. Reaction of Nitric Oxide with Amines and Arylhydrazines. **1998**, *11*(1), 35-7.

**63.**  Koprowski, H., II; Posner, G. H. Nonbiaryl Atropisomers: New Classes of Chiral Reagents, Auxiliaries, and Ligands? **1998**, *11*(1), 38-40.

**64.**  Groaning, M. D.; Meyers, A. I. Asymmetric Diels-Alder Reaction of Chiral 1-Amino-3-siloxy-1,3-butadiene: Application to the Enantioselective Synthesis of (-)--Elemene. **1998**, *11*(1), 41-5.

**65.**  Dai, L.-X.; Zhou, Y.-G. Highly Enantioselective Rh-Catalyzed Hydrogenations with a New Chiral 1,4-Bisphosphine Containing a Cyclic Backbone. **1998**, *11*(1), 46-51.

**66.**  Dax, S. L. 5,6-Cis-Penems: Broad-Spectrum Anti-Methicillin-Resistant Staphylococcus Aureus -Lactam Antibiotics. **1998**, *11*(1), 52-6.

**67.**  Hong, F.-T.; Paquette, L. A. Bu3SnH-Catalyzed Barton-McCombie Deoxygenation of Alcohols. Single-Step Process for the Reductive Deoxygenation of Unhindered Alcohols. **1998**, *11*(1), 67-72.

**68.**  Bionchini, C. Highly Efficient Epoxidation of Olefins using Aqueous H2O2 and Catalytic Methyltrioxorhenium/Pyridine: Pyridine-Mediated Acceleration. **1998**, *11*(2), 85-8.

**69.**  Van Horn, J. D.; Richmond, T. G. A C2 Symmetric Chiral Ketone for Catalytic Asymmetric Epoxidation of Unfunctionalized Olefins. Highly Enantioselective Epoxidation of Trans-Stilbenes Catalyzed by Chiral Ketones. **1998**, *11*(2), 89-94.

**70.**  Ho, R. Y. N.; Que, L., Jr. Oxidation of Hydrocarbons by [(Phen)2Mn(-O)2Mn(phen)2]3+ *via* Hydrogen Atom Abstraction. **1998**, *11*(2), 95-8.

**71.**  Bianchini, C. Aqueous Catalysis: Methylrhenium Trioxide (MTO) as a Homogeneous Catalyst for the Diels-Alder reaction. **1998**, *11*(2), 99-103.

**72.**  Hughes, R. P.; Trujillo, H. A. Selective Solubility of Organometallic Complexes in Saturated Fluorocarbons. Synthesis of Cyclopentadienyl Ligands with Fluorinated Ponytails. **1998**, *11*(2), 141-2.

**73.**  Fujimura, O.; De La Mata, F. J.; Grubbs, R. H. Synthesis of New Chiral Ligands and Their Group VI Metal Alkylidene Complexes. **1998**, *11*(2), 143-44.

**74.**  Schnaar, R. L. Influenza Neuraminidase Inhibitors Possessing a Novel Hydrophobic Interaction in the Enzyme Active Site: Design, Synthesis, and Structural Analysis of Carbocyclic Sialic Acid Analogs with Potent Anti-Influenza Activity. **1998**, *11*(3), 222-8.

**75.**  Molander, G. A. Application of Lanthanide and Group 3 Metallocene Catalysts to Small-Molecule Synthesis. **1998**, *11*(4), 237-63.

**76.**  Ruck-Braun, K.; Kunz, H. Catalytic Asymmetric Synthesis Using Rare Earth-Derived Heterobimetallic BINOL Complexes. **1998**, *11*(4), 264-7.

**77.**  Wender, P. A.; Dore, T. M. Radical Carboxylation: Ester Synthesis from Alkyl Iodides, Carbon Monoxide, and Alcohols under Irradiation Conditions. **1998**, *11*(4), 268-73.

**78.**  Wentland, M. P. 5-Substituted 2-Aminopyridine C-Nucleosides as Protonated Cytidine Equivalents: Increasing Efficiency and Selectivity in DNA Triple-Helix Formation. **1998**, *11*(4), 274-81.

**79.**  Davidov, P.; Houk, K. N. Chirality-Memory Molecule: A D2-Symmetric Fully Substituted Porphyrin as a Conceptually New Chirality Sensor. **1998**, *11*(4), 282-6.

**80.**  Zamojski, A. Enantioselective Catalytic Ring Opening of Epoxides with Carboxylic Acids. **1998**, *11*(4), 287-90.

**81.**  Walters, M. A. Macrocyclization on Solid Support using Heck Reaction. **1998**, *11*(4), 291-6.

**82.**  Figueiredo, T. L. C.; Dolphin, D. H. Meso-Arylporphyrins as Dienophiles in Diels-Alder Reactions: A Novel Approach to the Synthesis of Chlorins, Bacteriochlorins, and Naphthoporphyrins. **1998**, *11*(4), 297-300.

**83.**  Woo, L. K. Density Functional Study of the [2 + 2]- and [2 + 3]-Cycloaddition Mechanisms for the Osmium-Catalyzed Dihydroxylation of Olefins. **1998**, *11*(5), 319-326.

**84.**  Vlcek, A., Jr. Photochemical Activation of Metalloporphyrin Carbene Complexes. **1998**, *11*(5), 333-8.

**85.**  Morales, D.; Poli, R. Liquid-Biphase Hydrogenolysis of Benzo[b]thiophene by Rhodium Catalysis. **1998**, *11*(5), 346-51.

**86.**  Raymo, F. M.; Stoddart, J. F. From Supramolecular Complexes to Interlocked Molecular Compounds. **1998**, *11*(7), 491-511.

**87.**  Scheidt, K. A.; Roush, W. R. Applications of Zr-Catalyzed Carbomagnesation and Mo-Catalyzed Macrocyclic Ring Closing Metathesis in Asymmetric Synthesis. Enantioselective Synthesis of Sch 38516 (Fluvirucin B1). **1998**, *11*(7), 522-30.

**88.**  Dakin, L. A.; Panek, J. S. Recent Advances in Catalytic Asymmetric Epoxidation of Trisubstituted and Trans-Olefins. **1998**, *11*(7), 531-6.

**89.**  Rotella, D. P. Orally Active Trifluoromethyl Ketone Inhibitors of Human Leukocyte Elastase. **1998**, *11*(7), 546-9.

**90.**  Trumpp-Kallmeyer, S.; Showalter, H. D. H. Use of a Pharmacophore Model for the Design of EGFr Tyrosine Kinase Inhibitors: 4-(Phenylamino)pyrazolo[3,4-d]pyrimidines. **1998**, *11*(7), 550-60.

**91.**  Crawford, K. R.; Posner, G. H. A Highly Stereoselective Pentannulation of Prochiral Cyclic Enones Using a Chiral 1,3-Dipole Equivalent. **1998**, *11*(7), 561-4.

**92.**  Lupinetti, A. J.; Strauss, S. H. Superweak Anions - Chemistry and Catalysis: A Symposium Report. **1998**, *11*(8), 565-95.

**93.**  Marko, I. E.; Giles, P. R.; Tsukazaki, M.; Chelle-Regnaut, I.; Urch, C. J.; Brown, S. M.; Bianchini, C.; Barbaro, P. Efficient, Aerobic, Ruthenium-Catalyzed Oxidation of Alcohols into Aldehydes and Ketones. **1998**, *11*(8), 626-8.

**94.**  Sato, K.; Aoki, M.; Takagi, J.; Noyori, R.; Bianchini, C.; Barbaro, P. Organic Solvent- and Halide-Free Oxidation of Alcohols with Aqueous Hydrogen Peroxide. **1998**, *11*(8), 629-31.

**95.**  Bar*via*n, M. R. Solution-Phase Combinatorial Chemistry: Synthesis of Novel Heterocyclic Libraries. **1998**, *11*(9), 639-46.

**96.**  Boger, D. L.; Searcey, M. The First Synthesis of a Daphnane Diterpene: The Enantiocontrolled Total Synthesis of (+)-Resiniferatoxin. **1998**, *11*(9), 647-51.

**97.**  Walters, M. A. Solid-Phase Synthesis of Hybrid Thiazolidinedione-Fatty Acid PPAR Ligands. **1998**, *11*(9), 662-6.

**98.**  Buck, S. B.; Victory, S. F.; Himes, R. H.; Georg, G. I. Epothilones, A New Class of Microtubule-Stabilizing Agents with a Taxol-like Mechanism of Action. **1998**, *11*(9), 671-7.

**99.**  Appendino, G.; Casiraghi, G. The Synthesis of Epothilones: Highlights from a Year's Race. **1998**, *11*(9), 678-96.

**100.**  Marshall, J. A. Stereo- and Enantioselective Additions of Allylic, Propargylic, and Allenic Trihalosilanes to Aldehydes. **1998**, *11*(9), 697-712.

**101.**  Burk, M. J. The DuPHOS Ligands - A Historical Account. **1998**, *11*(11), 787-802.

**102.**  Casiraghi, G.; Zanardi, F.; Battistini, L.; Rassu, G.; Appendino, G. Current Advances in the Chemical Synthesis of Annonaceous Acetogenins and Relatives. **1998**, *11*(11), 803-27.

**103.**  Marshall, J. A. A Novel Method for Inside Selective Silylation of 1,2-Diols. **1998**, *11*(11), 828-31.

**104.**  Celatka, C. A.; Panek, J. S. Chiral Magnesium Bis(sulfonamide) Complexes as Catalysts for the Merged Enolization and Enantioselective Amination of N-Acyloxazolidinones. A Catalytic Approach to the Synthesis of Arylglycines. **1998**, *11*(11), 836-9.

**105.**  Chen, L.-B.; Berbreiter, D. E. Highly Active Pd(II) PCP-type Catalysts for the Heck Reaction. **1998**, *11*(11), 845-9.

**106.**  Marshall, J. A. Catalytic Asymmetric Allylation of Imines *via* Chiral Bis--allylpalladium Complexes. **1998**, *11*(11), 855-8.

**107.**  Vlcek, A., Jr. Topological Effects on Intramolecular Electron Transfer *via* Quantum Interference. **1998**, *11*(12), 859-65.

**108.**  Male, J. L.; Braden, D. A.; Tyler, D. R. Time-Resolved Infrared Spectral Studies of Photochemically Induced Oxidative Addition of Benzene to Trans-RhCl(CO)(PMe3)2. **1998**, *11*(12), 879-83.

**109.**  Burwell, R. L., Jr. A New Generation of Homogeneous Arene Hydrogenation Catalysts. **1998**, *11*(12), 884-92.

**110.**  Gallou, F.; Paquette, L. A. [6 + 2] and [6 + 4] Higher-Order Cycloadditions and Their Deployment in Total Synthesis. **2000**, *13*(4), 223-8.

**111.**  Nair, S. K.; Henri, J. T.; Georg, G. I. An Efficient Gram-Scale Synthesis of (+)-Discodermolide. **2000**, *13*(4), 229-36.

**112.**  Kellogg, R. M. A Practical Method for Alcohol Oxidation with Aqueous Hydrogen Peroxide under Organic Solvent- and Halide-Free Conditions. **2000**, *13*(4), 249-52.

**113.**  Marshall, J. A. Carbon-Carbon Bond Formation *via* Palladium-Catalyzed Reductive Coupling in Air. **2000**, *13*(4), 265-7.

**114.**  Walters, M. A. Synthesis and Preliminary Evaluation of a Library of Polycyclic Small Molecules for Use in Chemical Genetic Assays. **2000**, *13*(4), 268-75.

**115.**  Carruthers, N. I.; Li, X. Design, Synthesis, and Structure-Activity Relationships of Acetylene-Based Histamine H3 Receptor Antagonists. **2000**, *13*(4), 276-80.

**Chirality**

**116.** Huang, X.; Nakanishi, K.; Berova, N. Porphyrins and Metalloporphyrins: Versatile Circular Dichroic Reporter Groups for Structural Studies. **2000**, *12*(4), 237-55.

**Coordination Chemistry Reviews**

**117.** Munakata, M.; Wu, L. P.; Ning, G. L. A New Type of Multilayer System-Silver(I) Complexes of Polycyclic Aromatic Compounds. **2000**, (198), 171-203.

**118.** Okazaki, M.; Yuki, M.; Kuge, K.; Ogino, H. Cluster Synthesis by the Reactions of [Cp'2M2S4] with Metal Complexes (Cp' = Cp and Substituted Cyclopentadienyl Ligands, M = Fe, Ru). **2000**, (198), 367-78.

**119.** Osakada, K.; Yamamoto, T. Transmetalation of Alkynyl and Aryl Complexes of Group 10 Transition Metals. **2000**, (198), 379-99.

### Current Medicinal Chemistry

**120.** Proctor, G. R.; Harvey, A. L. Synthesis of Tacrine Analogues and Their Structure-Activity Relationships. **2000**, *7*(3), 295-302.

**121.** Jagt, D. L. V.; Deck, L. M.; Royer, R. E. Gossypol: Prototype of Inhibitors Targeted to Dinucleotide Folds. **2000**, *7*(4), 479-98.

### Current Organic Chemistry

**122.**  Mile, B. Free Radical Participation in Organic Chemistry: Electron Spin Resonance (ESR) Studies of Their Structures and Reactions. **2000**, *4*(1), 55-83.

**123.**  McNulty, J.; Still, I. W. J. Synthetic Approaches to the Eudistomin Marine Alkaloids. **2000**, *4*(2), 121-38.

**124.**  Vincente, M. G. H.; Smith, K. M. Porphyrins and Derivatives: Synthetic Strategies and Reactivity Profiles. **2000**, *4*(2), 139-74.

**125.**  Padwa, A.; Waterson, A. G. Synthesis of Nitrogen Heterocycles Using the Intramolecular Pummerer reaction. **2000**, *4*(2), 175-203.

**126.**  Jefford, C. W. Pyrroles as Building Blocks for the Enantioselective Synthesis of Indolizidines. **2000**, *4*(2), 205-30.

**127.**  Danieli, B.; Lesma, G.; Passarella, D.; Silvani, A. A Chemo-Enzymic Approach to Some Indole and Quinolizidine Alkaloids from Cs-Symmetric Precursors. **2000**, *4*(2), 231-61.

**128.**  Novak, B. H.; Hudlicky, T.; Reed, J. W.; Mulzer, J.; Trauner, D. Morphine Synthesis and Biosynthesis-An Update. **2000**, *4*(3), 343-62.

### European Journal of Organic Chemistry

**129.** Benshafrut, R.; Shabtai, E.; Rabinovitz, M.; Scott, L. T. -Conjugated Anions: From Carbon-Rich Anions to Charged Carbon Allotropes. **2000**, (7), 1091-106.

**130.** Toda, F. Naphthocyclobutenes and Benzodicyclobutadienes: Synthesis in the Solid State and Anomalies in the Bond Lengths. **2000,** (8), 1377-86.

**Heterocycles**

**131.** Ohmizu, H.; Ogiku, T.; Iwasaki, T. Stereocontrolled Synthesis of Unsymmetrically Substituted Furofuran Lignans. **2000**, *52*(3), 1399-409.

**132.** Saloutin, V. I.; Burgart, Y. V.; Kappe, C. O.; Chupakhin, O. N. Perfluorinated Acyl(aroyl)pyruvates as Building Blocks for the Synthesis of Heterocycles. **2000**, *52*(3), 1411-34.

**133.** Sekhar, B. C.; Ramadas, S. R.; Ramana, D. V. -Halovinyl Aldehydes as Versatile Reactive Intermediates in the Syntheses of Condensed Fused-Ring Polycyclic Heterocycles. **2000**, *53*(4), 941-77.

**134.** Levai, A.; Timar, T.; Sebok, P.; Eszenyi, T. Synthesis of 2,2-Dimethyl-2H-chromenes. **2000**, *53*(5), 1193-203.

**Journal of Combinatorial Chemistry**

**135.** Franzen, R. G. Recent Advances in the Preparation of Heterocycles on Solid Support: A Review of the Literature. **2000**, *2*(3), 195-214.

**Journal of Fluorine Chemistry**

**136.** Kharitonov, A. P. Practical Applications of the Direct Fluorination of Polymers. **2000**, *103*(2), 123-7.

**Journal of Heterocyclic Chemistry**

**137.** Levai, A. Synthesis and Chemical Transformations of 1,5-Benzothiazepines. **2000**, *37*(2), 199-214.

**Natural Product Reports**

**138.**  Allenmark, S. G. Chiroptical Methods in the Stereochemical Analysis of Natural Products (1975 to 1999). **2000**, *17*(2), 145-55.

**139.**  Hanson, J. R. Diterpenoids (1998). **2000**, *17*(2), 165-74.

**140.**  Lounasmaa, M.; Tolvanen, A. Simple Indole Alkaloids and Those with a Nonrearranged Monoterpenoid Unit (July 1997 to December 1998). **2000**, *17*(2), 175-91.

**141.**  Ferreira, D.; Li, X.-C. Oligomeric Proanthocyanidins: Naturally Occurring O-Heterocycles (January 1996 to December 1998). **2000**, *17*(2), 193-212.

**Organic Preparations and Procedures International**

**142.** Nikalje, M. D.; Phukan, P.; Sudalai, A. Recent Advances in Clay-Catalyzed Organic Transformations. **2000**, *32*(1), 1-40.

**Research on Chemical Intermediates**

**143.** Percino, M. J.; Chapela, V. M. Unexpected Intermediate 1-Phenyl-2-(4-pyridyl)ethanol Isolated from Benzaldehyde and 4-Picoline Condensation Reaction. **2000**, *26*(3), 303-7.

**Russian Chemical Reviews**

**144.**  Tomilov, Yu. V.; Kostyuchenko, I. V.; Nefedov, O. M. Synthesis and Properties of Nitrogenous Heterocycles Containing a Spiro Cyclopropane Fragment. **2000**, *69*(6), 507-27.

**145.**  Furin, G. G. Novel Aspects of Perfluoroalkyl Halide Application to the Synthesis of Fluorine-Containing Organic Compounds. **2000**, *69*(6), 538-71.

**146.**  Grigorieva, N. Ya.; Tsiklauri, P. G. Syntheses of Insect Pheromones with a (Z)-Trisubstituted Olefinic Fragment. **2000**, *69*(7), 624-41.

**147.**  Maretina, I. A.; Trofimov, B. A. Diacetylene: Industrially Promising Reactions. **2000**, *69*(7), 642-60.

**148.**  Boltalina, O. V.; Galeva, N. A. Direct Fluorination of Fullerenes. **2000**, *69*(7), 661-74.

**Russian Journal of Organic Chemistry**

**149.** Kriven'ko, A. P.; Sorokin, V. B. Synthesis and Reactions of 3-R-2,4-Diacetyl(diethoxycarbonyl)-5-hydroxy-5- Methylcyclohexanones and Related Substances. **1999**, *35*(8), 1097-112.

**150.** Sokolov, V. I. Chiral History of Fullerenes. **1999**, *35*(9), 1257-63.

**151.** Gorbunova, T. I.; Zapevalov, A. Y.; Saloutin, V. I. Synthesis of Polyfluorinated Dienes. **1999**, *35*(11), 1557-66.

**Science**

**152.** Deniz, A. A.; Peters, K. S.; Snyder, G. J. Experimental Determination of the Antiaromaticity of Cyclobutadiene. **1999**, *286*(5442), 1119-22.

**153.** ten Brink, G.-j.; Arends, I. W. C. E.; Sheldon, R. A. Green, Catalytic Oxidation of Alcohols in Water. **2000**, *287*(5458), 1636-9.

**154.** Rademann, J.; Jung, G. Techview: Drug Discovery: Integrating Combinatorial Synthesis and Bioassays. **2000**, *287*(5460), 1947-8.

**155.** Schreiber, S. L. Target-Oriented and Diversity-Oriented Organic Synthesis in Drug Discovery. **2000**, *287*(5460), 1964-9.

**156.** Jia, C.; Piao, D.; Oyamada, J.; Lu, W.; Kitamura, T.; Fujiwara, Y. Efficient Activation of Aromatic C-H Bonds for Addition to C-C Multiple Bonds. **2000**, *287*(5460), 1992-5.

**157.** Buron, C.; Gornitzka, H.; Romanenko, V.; Bertrand, G. Stable Versions of Transient Push-Pull Carbenes: Extending Lifetimes from Nanoseconds to Weeks. **2000**, *288*(5467), 834-6.

**Synlett**

**158.** El Ali, B.; Alper, H. The Application of Transition Metal Catalysis for Selective Cyclocarbonylation Reactions. Synthesis of Lactones and Lactams. **2000**, (2), 161-71.

**159.** Pons, M.; Albericio, F.; Royo, M.; Giralt, E. Disulfide Bonded Cyclic Peptide Dimers and Trimers: An Easy Entry to High Symmetry Peptide Frameworks. **2000**, (2), 172-81.

**160.** Lash, T. D. Carbaporphyrinoids: Taking the Heterocycle Out of Nature's [18]Annulene. **2000**, (3), 279-95.

**161.** Robinson, J. A. The Design, Synthesis and Conformation of Some New -Hairpin Mimetics: Novel Reagents for Drug and Vaccine Discovery. **2000**, (4), 429-41.

**162.** Merino, P.; Franco, S.; Merchan, F. L.; Tejero, T. Nucleophilic Additions to Chiral Nitrones: New Approaches to Nitrogenated Compounds. **2000**, (4), 442-54.

**Synthesis-Stuttgart**

**163.** Gao, H.; Mitra, A. K. Synthesis of Acyclovir, Ganciclovir and Their Prodrugs: A Review. **2000**, (3), 329-51.

**164.** Pedersen, O. S.; Pedersen, E. B. The Flourishing Syntheses of Non-Nucleoside Reverse Transcriptase Inhibitors. **2000**, (4), 479-95.

**165.** Gebauer, O.; Bruckner, R. -Alkoxycarbonyl Enol Triflates as Precursors of Stereopure 3-Ene-1,5-diyne Building Blocks for the Chromophores of Neocarzinostatin, C-1027, Kedarcidin, Maduropeptin, and N1999A2. **2000**, (4), 588-602.

**Tetrahedron**

**166.** Mehta, G.; Venkateswaran, R. V. Haller-Bauer Reaction Revisited: Synthetic Applications of a Versatile C-C Bond Scission Reaction. **2000**, *56*(11), 1399-422.

**167.** Stratakis, M.; Orfanopoulos, M. Regioselectivity in the Ene Reaction of Singlet Oxygen with Alkenes. **2000**, *56*(12), 1595-615.

**168.** Krygowski, T. M.; Cyranski, M. K.; Czarnocki, Z.; Hafelinger, G.; Katritzky, A. R. Aromaticity: A Theoretical Concept of Immense Practical Importance. **2000**, *56*(13), 1783-96.

**169.** Brimble, M. A.; Nairn, M. R.; Prabaharan, H. Synthetic Strategies Towards Pyranonaphthoquinone Antibiotics. **2000**, *56*(14), 1937-92.

**170.** Spencer, R. P.; Schwartz, J. Titanium(III) Reagents in Carbohydrate Chemistry: Glycal and C-Glycoside Synthesis. **2000**, *56*(15), 2103-12.

**171.** Theodoridis, G. Nitrogen Protecting Groups: Recent Developments and New Applications. **2000**, *56*(16), 2339-58.

**172.** Bergmeier, S. C. The Synthesis of Vicinal Amino Alcohols. **2000**, *56*(17), 2561-76.

**Tetrahedron-Assymetry**

**173.** Cativiela, C.; Diaz-De-Villegas, M. D. Stereoselective Synthesis of Quaternary -Amino Acids. Part 2: Cyclic Compounds. **2000**, *11*(3), 645-732.

**Trends in Biotechnology**

**174.** Wentworth, P. Recent Developments and Applications of Liquid-Phase Strategies in Organic Synthesis. **1999**, *17*(11), 448-52

**175.** Mayo, K. H. Recent Advances in the Design and Construction of Synthetic Peptides: For the Love of Basics or Just for the Technology of It. **2000**, *18*(5), 212-7.

**Monographs**

**176.** Finch, P., Ed. Carbohydrates, Structures, Syntheses and Dynamics. Kluwer: Dordrecht, Netherlands, 1999.

**177.** Fleet, G. W. J., Ed. Special Issue: Carbohydrate Science, Part 2. [In *Tetrahedron: Assymetry*, **2000**, *11*(2)]. Elsevier: Oxford, U.K., 2000.

**178.** Gawronski, J.; Gawronska, K. Tartaric and Malic Acids in Synthesis: A Source Book of Building Blocks, Ligands, Auxiliaries, and Resolving Agents. Wiley: New York, 1998.

**179.** Gorog, S. Identification and Determination of Impurities in Drugs; Vol. 34. Elsevier Science: Amsterdam, The Netherlands, 2000.

**180.** Greenberg, A.; Breneman, C. M.; Liebman, J. F., Eds. Amide Linkage: Selected Structural Aspects in Chemistry, Biochemistry, and Materials Science. Wiley: New York, 2000.

**181.** Gupta, R. R.; Kumar, M.; Gupta, V. Heterocyclic Chemistry I. Springer: Berlin, Germany, 1998.

**182.** Haiduc, I.; Edelmann, F. T. Supramolecular Organometallic Chemistry. Wiley-VCH: Weinheim, Germany, 1999.

**183.** Harmata, M., Ed. Advances in Cycloaddition; Vol. 6. JAI: Stamford, Connecticut, 1999.

**184.** Jacobsen, E. N.; Pfaltz, A.; Yamamoto, H., Eds. Comprehensive Asymmetric Catalysis; Vol. 1-3. Springer: Berlin, Germany, 1999.

**185.** Jaouen, G. Special Issue on Bioorganometallic Chemistry. [In: *J. Organomet. Chem.*, **1999**; *589*(1)]. Elsevier: Lausanne, Switzerland, 1999.

**186.** Kelly, S. M. Flat Panel Displays: Advanced Organic Materials. The Royal Society of Chemistry: Cambridge, U.K., 2000.

**187.** Leach, M. R. Lewis Acid/Base Reaction Chemistry. Meta-Synthesis.Com: Brighton, U.K., 1999.

**188.** Lednicer, D.; Mitscher, A. The Organic Chemistry of Drug Synthesis; Vol. 6. Wiley: New York, 1998.

**189.** Lide, D. R., Jr., Ed. Properties of Organic Compounds CRCnetBASE 1999. Springer: Berlin, Germany, 1998.

**190.** Lightner, D. A.; Gurst, J. E. Organic Conformational Analysis and Stereochemistry from Circular Dichroism Spectroscopy. Wiley-VCH: New York, 2000.

**191.** Marko, I. E. Oxidations. Oxford University Press: Oxford, U.K., 1998.

**192.** Moro-oka, Y.; Yamazoe, N.; Kagawa, S.; Iwamoto, M., Eds. Special Issue: Structure-Function Relationship in Catalytic Chemistry. (A Collection of Papers Published in Memory of the Late Tetsuro Seiyama (1920-1997).) [In: *J. Mol. Catal. A: Chem*., **2000**; *155*(1-2)]. Elsevier: Amsterdam, Netherlands, 2000.

**193.** Pandalai, S. G., Ed. Recent Research Developments in Organic Chemistry; Vol. 2, Part 1. Transworld Research Network: Trivandrum, India, 1999.

**194.** Porco, J. A., Jr.; Labadie, J. W., Eds. Special Issue on Polymer Supports for Streamlined Organic Synthesis. [In: *Biotechnol. Bioeng*., **2000**; *71*(1)]. Wiley: New York, 2000.

**195.** Romeo, J. T.; Ibrahim, R.; Varin, L.; De Luca, V. Evolution of Metabolic Pathways: Recent Advances in Phytochemistry; Vol. 34. Elsevier Science: Amsterdam, The Netherlands, 2000.

**196.** Sauvage, J. P.; Dietrich-Buchecker, C., Eds. Molecular Catenanes, Rotaxanes and Knots: A Journey Through the World of Molecular Topology. Wiley-VCH: Weinheim, Germany, 1999.

**197.** Scrimin, P.; Taddei, M.; Brandi, A.; Riccio, R., Eds. Seminars in Organic Synthesis; Vol. 9. Italian Chemical Society: Rome, Italy, 2000.

**198.** Soloshonok, V. A., Ed. Enantiocontrolled Synthesis of Fluoro-Organic Compounds: Stereochemical Challenges and Biomedical Targets. Wiley: Chichester, W. Sussex, U.K., 1999.

**199.** Wade, L. G. Organic Chemistry, 4th Edition. Prentice Hall: Upper Saddle River, NJ, 1998.

**INDEX**

Acetogenins, 102

Acetylcholinesterase inhibitor, 120

Acyclovir, synthesis, 163

Acyloxazolidinone, chiral amination, 104

Adhesion promoters, polyaminoquinones, 53

Alcohol oxidation, in aqueous hydrogen peroxide, 94, 112

ruthenium catalyzed, 93

Alcohols, Barton McCombie deoxygenation, 67

deoxygenation, with tributylstannane, 67

oxidation in water, 153

Aldehydes, environmentally clean preparation, 153

from alcohols, 93

halovinyl, fused heterocycles, 133

silane stereoselective addition, 100

spectrophotometry, 15

Aldol condensation, with zinc acetylide, 6

Aldol reaction, asymmetric catalysis, 11

Lewis bases, 11

Alkaloids, indole, 127, 140

indolizidine, preparation, 126

marine, 123

quinolizidine, preparation, 127

Alkanes, linear, oxidation, over molecular sieves, 29

Alkanethiolates, on gold, cell adhesion model, 47

Alkenes, asymmetric epoxidation, 88

dihydroxylation, with osmium, 83

enantioselective epoxidation, 69

ene reaction with singlet oxygen, 167

epoxidation, 68

polymerization, 54

Amide linkages, book, 180

Amido transition metal reactions, 24

Amidocarbonylation, 30

Amines, reaction with nitric oxide, 62

Amino acids, derivatives, 30

quaternary -, 173

Amino alcohols, vicinal, synthesis, 172

Aminocycloalkylcarboxylic acids, 173

Aminopyridine C-nucleosides, 78

Analysis, odor, 50

scanning near-field optical microscopy, 33

Anions, superweak, 92

Anions, -conjugated, 129

Annonaceous acetogenin, synthesis, 102

Antibiotics, chromophores, 165

for methicillin resistant staph., 66

penem, 66

pyranonaphthoquinone, 169

-lactam, 66

Anticancer agents, gossypol, 121

Anticancer vaccine, synthetic carbohydrates, 27

Antifertility agents, gossypol, 121

Anti-herpes agents, 163

Antihistamine, 115

Anti-influenza agents, 74

Antitumor agents, phenylaminopyrazolopyrimidine, 90

Antiviral agents, gossypol, 121

Arenes, hydrogenation, 109

Aromatic radical cations, -bond cleavage, 1

Aromaticity, 168

Aromatics, C-H bond activation, 156

Arylglycine preparstion, 104

Arylhydrazine, reaction with nitric oxide, 62

Asymmetric autocatalysis, 7

Asymmetric catalysis, nonlinear effects, 8

Asymmetric synthesis, 18

BINOL catalyst, 76

with -haloboronic esters, 52

Atropisomers, nonbiaryl chiral reagent, 63

Autooxidation catalysts, zeolites, 29

Azepanecarboxylic acid, alkyl, 173

Aziridinecarboxylic acid, 173

Azlactone, acylated, rearrangement, 9

Azocanecarboxylic acid, alkyl, 173

Bacteriochlorin, 82

Baylis Hillman asymmetric synthesis, 61

Benzaldehyde, with picoline, 143

Benzodicyclobutadienes, preparation, 130

Benzopyran, preparation, 134

Benzothiazepines, 137

Benzothiophene, hydrogenolysis, 85

Benzothiopyran, preparation, 134

Biomimetics, metalloenzymes, 46

Bioorganometallic chemistry, 185

Biphosphine chiral ligand, for hydrogenation, 65

Brassinosteroids, book, 195

Butadiene, aminosiloxy, Diels-Alder reaction, 64

Calixpyrroles, 55

Carbaporphyrinoids, 160

Carbenes, bistrifluoromethylphenyl phosphanyl, 157

phosphino trifluoromethyl, 157

Carbohydrates, 177

amphiphilic sugars, 43

book, 176

C-glycoside synthesis, 170

cyclopropanated, 42

hydrazine derivatives, 14

hydrazone derivatives, 14

osazone derivatives, 14

thiocarbonyl, 13

titanocene reagents, 170

zirconocene reagents, 170

Carbomagnesation, in fluvirucin synthesis, 87

Carbon allotropes, charged, 129

Carboxylation, of alkyl iodides, 77

Catalysis, asymmetric, book, 184

structure-function, book, 192

Catalysts, chiral, magnesium bissulfonamide, 104

chiral, nucleophilic, 9

methyltrioxorhenium/pyridine, 68

montmorillonite clay, 142

nickel complexes, 51

palladium PCP-type, 105

rare earth BINOL complex, 76

rhodium, hydrogenation, 65

ruthenium complexes, 51

Catenanes, book, 196

recognition, 86

self-assembly, 86

C-C bond formation catalyst, 6

C-C bond scission, 166

C-C bond, *via* reductive coupling, 113

Cell adhesion model, 47

Chemical sensors, arrays, 38-40

conjugated polymer, 37

Chiral molecules, automultiplication, 7

Chirality sensor, porphyrin, 79

Chlorin, 82

Chloroarenes, palladium catalyzed reactions, 17

Chromenes, dimethyl preparation, 134

Circular dichroism spectroscopy, book, 190

Combinatorial biosynthesis, medicinal chemistry, 58

Combinatorial chemistry, 34, 197

and bioassay, 154

drug discovery, 154

solution phase, 95

Combinatorial libraries, glycopeptides, 31

oligosaccharides, 31

solution phase, 174

Corrosion inhibitors, polyaminoquinones, 53

Coupling reaction, Ni catalyzed, 12

Cyclization, nickel catalyzed, 12

Cycloaddition, book, 183

natural product synthesis, 110

Ni catalyzed, 12

Cycloalkylcarboxylic amino acid, 173

Cyclobutadiene, antiaromaticity, 152

Cyclocarbonylation reactions, transition metal catalyst, 158

Cyclopentadienyl ligands, with fluorinated ponytail, 72

Cytidine equivalents, 78

Cytochrome P450, in plant, book, 195

Daphnane diterpene, 96

Diacetylene, 147

Diacetylhydroxymethyl cyclohexanone preparation, 149

Diels-Alder reaction, aminosiloxybutadiene, 64

methylrhenium trioxide catalyst, 71

with meso-arylporphyrins, 82

Dienes, polyfluorinated, synthesis, 151

Dihydroxylation, with oxygen and osmium, 23

Diols, selective silylation, 103

Discodermolide, gram scale synthesis, 111

Diterpenes, 139

DNA triplex-helix formation, 78

Drug delivery, anions, 55

Drugs, impurities, book, 179

Electroluminescent organic materials, book, 186

Electron transfer, intramolecular, quantum interference, 107

Electronic nose, 50

Elemene, enantioselective synthesis, 64

Enediyne synthons, 165

Enol triflates, alkynyl, precursors, 165

Enones, prochiral cyclic, stereoselective pentannulation, 91

Enzyme inhibitors, dinucleotide folds, 121

Enzymes, mimetics, 46

plant, book, 195

Epidermal growth factor receptor inhibitor, 90

Epothilone preparation, 98-9

Epoxides, ring opening, 10, 80

Esters, carboxylate, preparation with irradiation, 77

-haloboronic, 52

Ethanol, phenylpyridyl-, preparation, 143

Ferrocenyl benzene, electronic coupling, 107

Fluorination, book, 198

Fluorination, perfluoroalkyl halides, 145

Free radicals, ESR, 122

Fullerenes, chiral, 150

fluorination, 148

Functional group transformation, 197

Fungal metabolites, preparation, 32

Ganciclovir, synthesis, 163

Glucosides, cyanogenic, book, 195

Glycopeptides, combinatorial library, 31

Glycosphingolipids, 44

Haller Bauer reaction, 166

Heck reaction, Pd catalysts, 105

Hemoproteins, preparation, 21

Heterocycles, book, 181

fused polycyclic, 133

library, 95

nitrogenous, preparation, 125

nitrogenous, spiro cyclopropane, 144

nitrogenous, synthesis, book, 197

oxygen-containing, 141

planar, chiral, 9

synthesis on solid supports, 135

Histamine antagonists, 115

Homogeneous catalysts, arene hydrogenation, 109

Hydrocarbon oxidation, hydrogen abstraction, 70

with manganese phenanthrene, 70

Hydroxylamines, synthesis, 162

Hydroxylation, with oxygen and osmium, 23

Imines, allylation, 106

Indole alkaloids, 140

preparation, 127

Indolizidine preparation, from pyrroles, 126

Influenza neuraminidase inhibitor, 74

Ketenes, reaction with alcohols, 9

Ketones, environmentally clean preparation, 153

from alcohols, 93

Lactams, -, synthesis, 197

Lactanes, synthesis, 158

Lactones, synthesis, 158

Lanthanides, small molecule synthesis, 75

Leukocyte elastase inhibitor, 89

Lewis acids, book, 187

Lewis bases, book, 187

Ligands, chiral, asymmetric reactions, 4

chiral, group VI metal alkylidene, 73

chiral, monodentate phosphine, 4

cyclopentadienyl, chelate complex, 35

phosphino oxazoline, asymmetric catalysis, 2

Lignans, furofuran, preparation, 131

Macrocyclization, solid support, Heck reaction, 81

Macrolactonization, in fluvirucin synthesis, 87

Magnesium reagent, in synthesis, 48

Malic acid, book, 178

Metallocenes, small molecule synthesis, 75

Metalloenzymes, biomimetics, 46

Metalloporphyrins, carbene complexes, photochemistry, 84

CD chromophore, 116

Methylchromene, preparation, 134

Microtubule stabilizing agents, 98

Microwaves, in radiochemistry, 45

Molecular recognition, 86

Molecular sieves, alkane oxidation, 29

Molecular switches, chiroptical, 36

Montmorillonite clay, catalysis, 142

Morphine, synthesis, 128

Naphthocyclobutenes, preparation, 130

Naphthoporphyrins, 82

Natural products, configuration, 138

in evolution, book, 195

optical rotation, 138

synthesis, book, 197

synthesis, cycloaddition, 110

total synthesis, 19

Nickel catalyst, 12

Nitrogen protective groups, 171

Nitrogenated compounds, 162

Nitrones, nucleophilic addition, 162

Nonlinear effects, in catalysis, 25

Olefins, trans, aymmetric epoxidation, 88

tri-substituted, epoxidation, 88

Oligosaccharide, combinatorial library, 31

Organic chemistry, general, book, 193, 199

Organic ions, gas phase, thermochemistry, 20

Organic light-emitting diodes, book, 186

Organic properties, computer optical disc, 189

Organofluorine compounds, book, 198

Organoiron complexes, 118

Organometallic complexes, in saturated fluorocarbons, 72

in synthesis, 197

Organoruthenium complexes, 118

Organosilver compounds, sandwich, 117

Organosulfur complexes, 118

Oxidations, book, 191

Palladium, in synthesis, 197

Parallel kinetic resolutions, 28

Pentafluorobenzoylpyruvate, heterocycle synthesis, 132

Peptides, cyclic, dimers, 159

high symmetry, 159

mimetic -hairpin, 161

synthesis, 175

Pharmaceuticals, diversity oriented discovery, 155

synthesis, book, 188

target oriented discovery, 155

Phenanthroperylene quinones, 16

Phenols, in plants, book, 195

Phenylaminopyrazolopyrimidine, 90

Phenylpyridylethanol intermediate, 143

Pheromones, (Z)-trisubstituted olefins, 146

insect, synthesis, 146

Phosphinooxazoline ligands, 2

Phospholane ligands, asymmetric catalysis, 5

Phospholano benzene ligand, catalyst, 101

Phosphonates, -amino, 49

-hydroxy, 49

Phosphonium cation, planar, 26

Phosphoramidites, for asymmetric conjugate addition, 3

Photochemistry, asymmetric synthesis, 18

Photoreceptors, stentorin, 16

Photosensitizers, hypericin, 16

Phthalocyanines, solid phase synthesis, 34

Phytochemistry, book, 195

Pipecolic acid, alkyl, 173

Polyaminoquinones, 53

Polycyclic libraries, for genetic assay, 114

Polyethylene, catalysts, 54

Polyfluorinated dienes, 151

Polyfluoroacylpyruvate, heterocycle synthesis, 132

Polyketides, book, 195

combinatorial chemistry, 58

Polymerization, living radical, 51

Polymers, acrylic, catalyzed, 51

fluorination, 136

light-emitting, book, 186

organic-inorganic hybrid, 57

styrenic, catalysts, 51

supports, in organic synthesis, book, 194

Polyphenols, from natural phenols, 56

Porphyrins, 124

CD chromophore, 116

chirality sensors, 79

D2 symmetric, 79

solid phase synthesis, 34

Proanthocyanidin, from flavanol, 141

Proteins, chalcone synthase, book, 195

Pummerer reaction, intramolecular, 125

Purpald reagent, with aldehydes, 15

Quinolizidine alkaloids, preparation, 127

Receptors, synthetic, 197

Resiniferatoxin, enantiocontrolled synthesis, 96

Reverse transcriptase inhibitors, non-nucleoside, 164

Rhodium complex, oxidative addition of benzene, 108

Ring closure, molybdenum catalyst, 87

Rotaxanes, book, 196

Sapphyrins, separating oligonucleotides, 55

Scanning microscopy, 33

Sialic acid analogs, 74

Silver, polycyclic aromatic multilayer, 117

Solid phase synthesis, phthalocyanines, 34

porphyrins, 34

Solvents, fluorocarbons, 72

Stilbenes, enantioselective epoxidation, 69

Sugar isothiocyanates, 13

Supramolecular chemistry, 41

Supramolecular systems, 197

Supramolecules, book, 182

spectroscopy, 33

Synthesis, liquid phase, 174

Tacrine analogs, synthesis, 120

Tartaric acid, book, 178

Taxanes, taxusin, 59

Taxol, equivalents, 96

total synthesis, 60

Taxusin, total synthesis, 59

Terpene alkaloids, 140

Terpenoids, in conifers, book, 195

Tetrathiafulvalene, 41

Thiazolidinedione fatty acid ligands, synthesis, 97

Thioamides, preparation, 13

Thiocarbamates, preparation, 13

Thiochromene, preparation, 134

Thiourea, preparation, 13

Titanocenes, carbohydrate synthesis, 170

Transmetalation, of alkynyl metal complex, 119

of aryl metal complex, 119

Trifluoromethyl ketone inhibitor, 89

Volatile organic compounds, sensing, 39-40

Zeolites, alkane oxidation, 29

Co-containing, 29

Mn-containing, 29

Zirconium catalyst, carbomagnesation, 87

Zirconium phosphorus chemistry, 22

Zirconocenes, carbohydrate synthesis, 170
